# Supplementary material for: Distinction strategies based on discriminant function analysis for particular steel grades at elevated temperature using stand-off LIBS
Source: Royal Society of Chemistry journal article supplement (doi:10.1039/c6ja00219f), 2016-01-01
Supplement: c6ja00219f1.pdf [file c6ja00219f1.pdf]

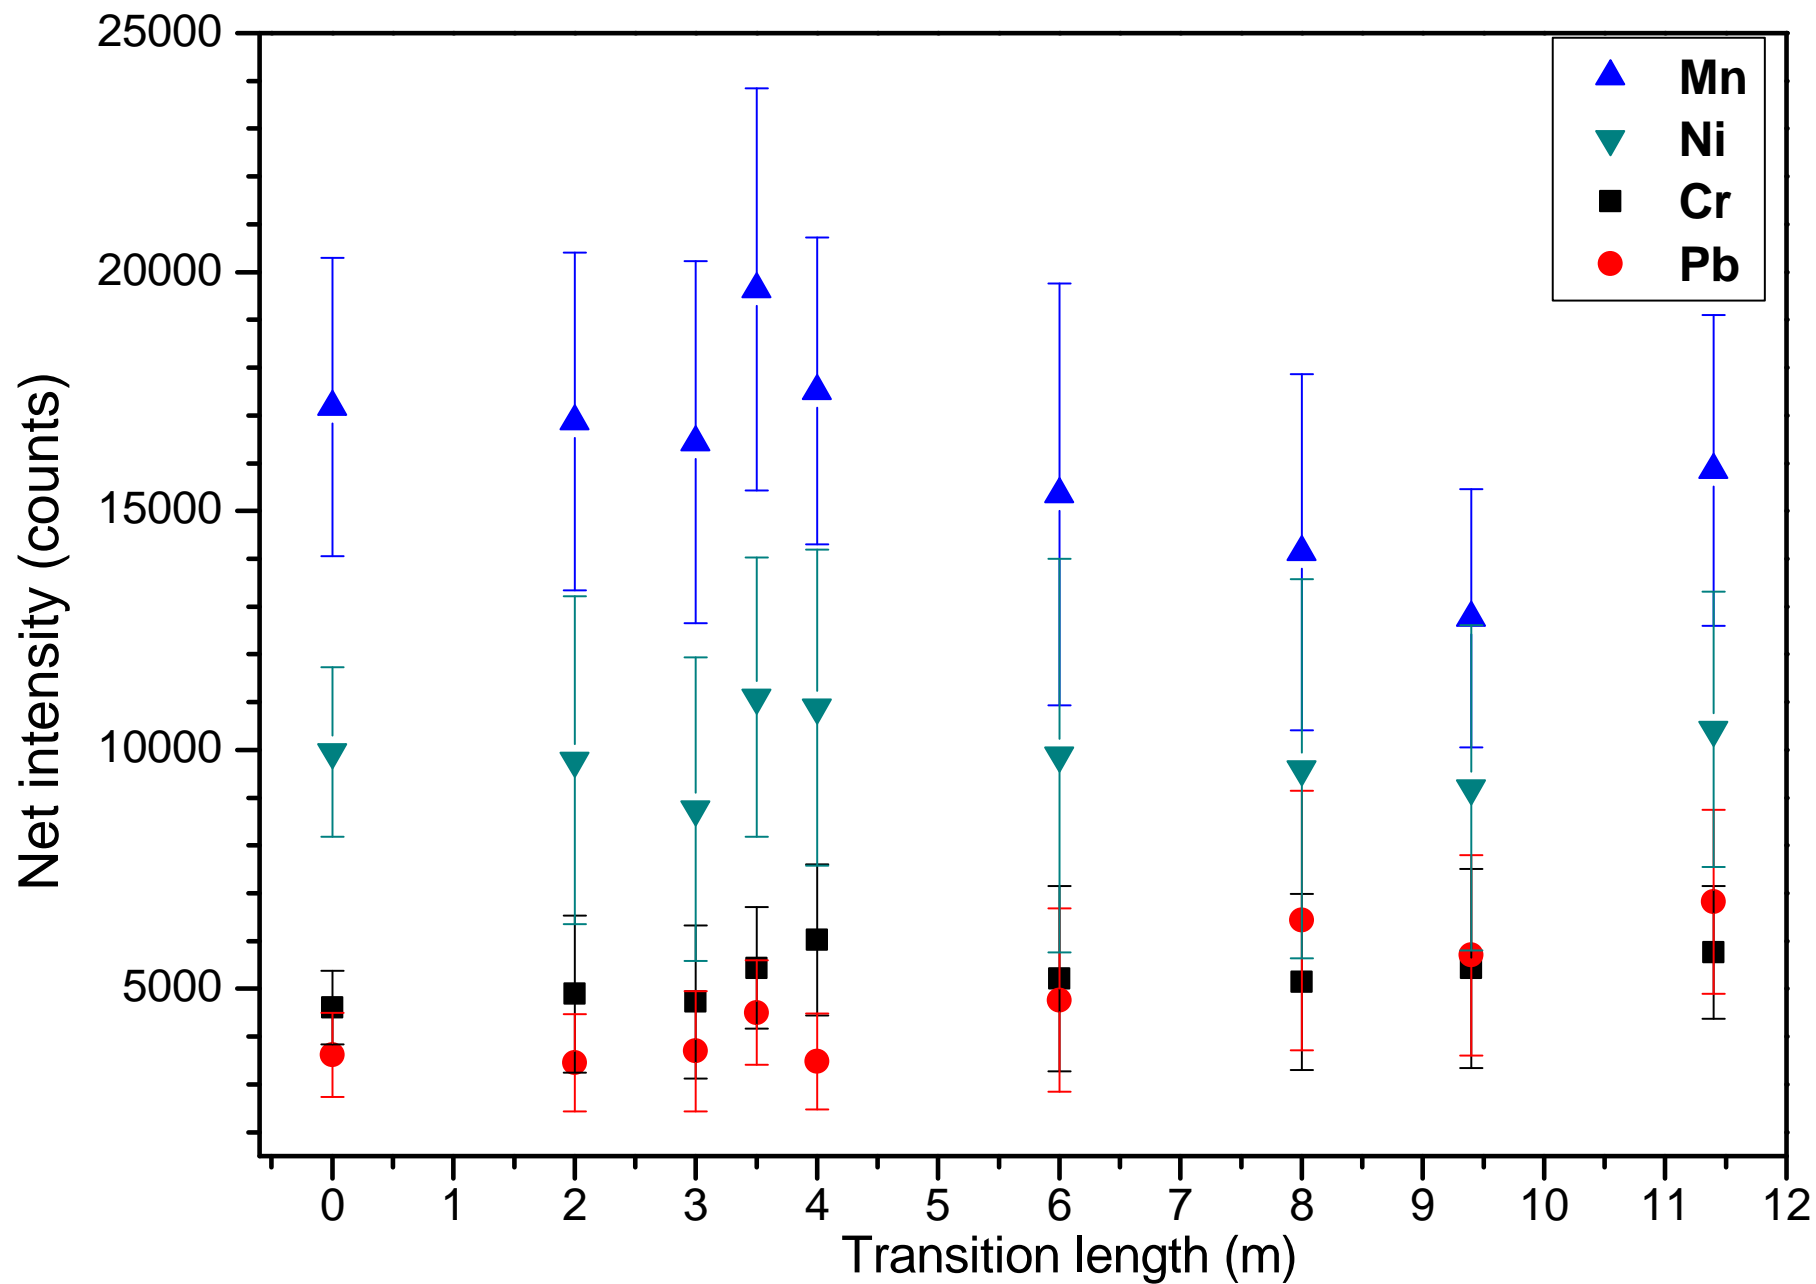

**Figure.** LIBS net intensities corresponding to the analyzed steel samples of GDU transition (each point, average of 40 shots).

Experiment was carried out at 900°C into a furnace in double-pulse excitation mode.
